# Supplementary material
Source: Springer Nature journal article supplement (https://www.springermedizin.de/resource/supplementary/12883_2011_563_MOESM3_ESM.pdf/9455750)

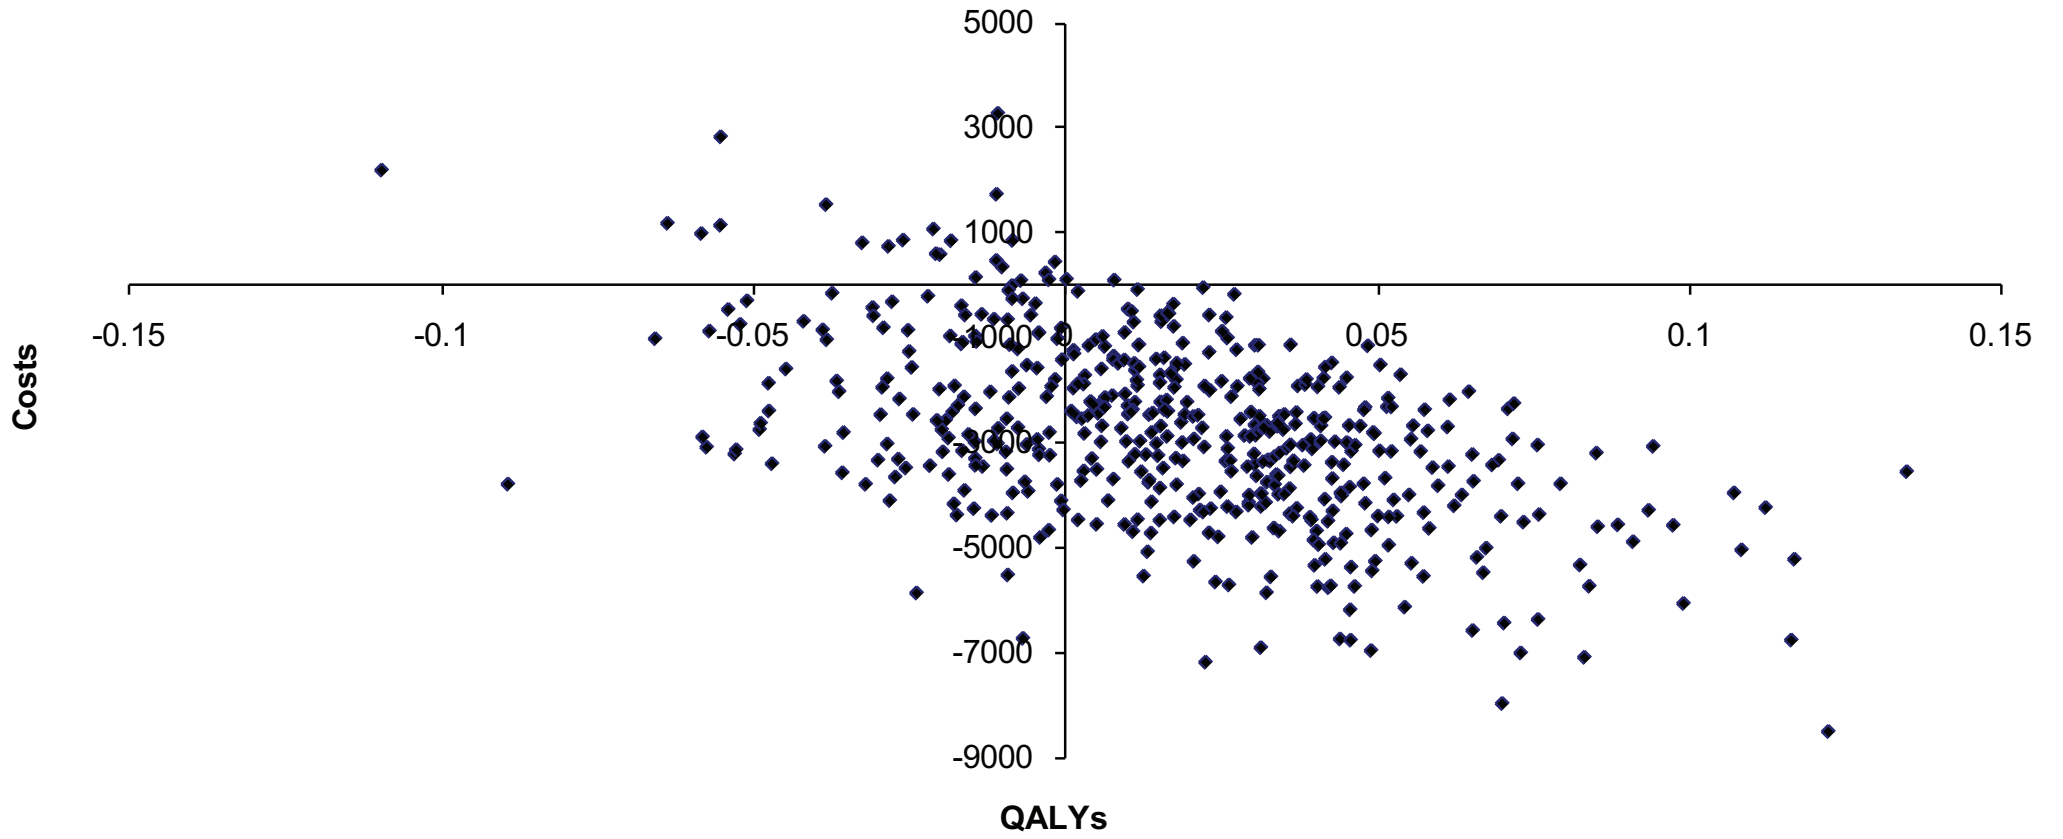

Supplement: MOESM3 [file 9455750]
